# Supplementary material
Source: Research Square preprint supplement (doi:10.21203/rs.3.rs-9116334/v1)
Supplement: Supplementary file 1 [file 9e082a509031c68458c4c87d.docx]

Supplementary Materials

# NAKO baseline examination of host factors

Supplementary Table 1: NAKO examination module descriptions

| Measurand  [variable name in NAKO] | Method of measurement |
| --- | --- |
| Anthropometrics | |
| BMI [a_anthro_bmi] | Method is described by Fischer et al. [1] |
| Body fat [a_anthro_fettmasse] | Method is described by Fischer et al. [1] |
| Comorbidities | |
| Periodontitis [d_oh1] | CAWI: “Has a dentist ever diagnosed you with periodontitis or paradentosis, i.e., an inflammation of the tissues supporting the teeth?” |
| Renal insufficiency [d_an_neph] | CAPI: “Has a doctor ever diagnosed you with impaired kidney function or chronic kidney insufficiency?” |
| Diabetes Mellitus [d_an_met_1] | CAPI: “Has a doctor ever diagnosed you with any of the following metabolic disorders? – ‘Sugar disease’ or diabetes mellitus” |
| Depression [d_an_neu_5] | CAPI: “Has a doctor or psychotherapist ever diagnosed you with any of the following neurological or psychiatric conditions? – Depression” |
| Demographics | |
| Sex [sex] | Method is described by Dragano et al. [2] |
| Age [age] | Method is described by Dragano et al. [2] |
| Early life factors | |
| C-section [d_ff7] | CAWI: “Were you born by cesarean section?” |
| Premature birth [d_ff6] | CAWI: “Were you born prematurely, i.e., more than four weeks before your due date?” |
| Breastfeeding [d_ff9] | CAWI: “Were you breastfed as a baby?” |
| Farm animal contact during childhood [d_ff11] | CAWI: “Did you live on a farm with close contact to farm or stable animals as a young child (i.e., under 6 years old)?” |
| Kindergarten [d_ff12] | CAWI: “Did you attend a nursery or kindergarten during your childhood?” |
| Siblings [d_ff1] | CAWI: “How many biological siblings do you have or did you have?” |
| General health markers | |
| Elevated blood lipids [d_an_met_2] | CAPI: “Has a doctor ever diagnosed you with any of the following metabolic disorders? – Elevated blood lipids, i.e., cholesterol or triglycerides” |
| Self-reported health status [d_qol2] | CAWI: “How would you describe your general state of health?” |
| Lifestyle factors | |
| Smoking habits [a_smok_stat_qn] [a_lifetime_cigs] | Method is described by Karrasch et al. [3] and Völker et al. [4] |
| Alcohol consumption [d_alk1] | CAWI: Item 1 of AUDIT questionnaire [5] |
| Physical activity at work [d_p1] | CAWI: “Does your work involve intense physical activity that causes your breathing and heart rate to increase significantly, such as carrying or lifting heavy loads, digging, or construction work lasting at least ten minutes?” |
| Medication and allergies | |
| Antibiotic use (last 12 months) [d_inf4] | CAWI: “How often have you taken antibiotics in the past 12 months?” [6] |
| Any antibiotic use [d_inf4_cat] | if answer to [d_inf4_cat] is once or more often |
| Allergy diagnosis [d_an_all] | CAPI: “Has a doctor ever diagnosed you with an allergy?” |
| Respiratory health | |
| Susceptibility to infections (last 12 months) [d_inf1] | CAWI: “Are you prone to infections, i.e., do you have more than three infections per year?” |
| Asthma [d_lg2] | CAWI: “Have you ever had asthma?” [7] |
| Nasal sinus surgery [d_op_entf_5] | CAPI: “Has any of the following organs ever been partially or completely removed through surgery? – Nasal polyps (in the sinuses)” |
| Nasal problems (without common cold) [d_lg3] | CAWI: “Have you ever had problems with sneezing fits or a runny or blocked nose without having a cold or the flu?” [7] |
| Respiratory infections (last 3 weeks) [spiro_ab_infekt] | Anamnesis before spirometry: “Have you had a respiratory infection in the past 3 weeks?” [3] |
| FEV1 [spiro_mw_fev1] | Method is described by Karrasch et al. [3] |
| Upper respiratory tract infection (last 12 months) [d_inf2_1] | CAWI: “How often have you had an upper respiratory tract infection in the past 12 months (e.g., a cold or infections of the sinuses, tonsils, middle ear, throat, or larynx)? Please count the total number of times you have suffered from these infections in the past 12 months.” [8] |
| Sociodemographics | |
| Employment status [a_ses_ewstat] | Method is described by Dragano et al. [2] |
| Number of children [a_ses_child] | Method is described by Dragano et al. [2] |
| Housing status [d_se_w1] | Method is described by Dragano et al. [2] |
| Household size [d_se_w2] | Method is described by Dragano et al. [2] |
| Education [d_se_b1] | Method is described by Dragano et al. [2] |

CAPI: Computer assisted personal interviewing; CAWI: Computer assisted web interviewing

# Host factor variable recoding

Cigarette smoking was self-reported using a touchscreen questionnaire. First, participants were asked whether they had ever smoked (at least 100 cigarettes during their lifetime). Subsequently, they were categorized as having never smoked, having formerly smoked (irrespective of time since cessation), or currently smoking [4]. The average lifetime number of cigarettes smoked per day was calculated for former and current smokers to estimate the mean number of cigarettes smoked per day during their smoking career. Thus, lifetime cigarette consumption was zero for all participants who had never smoked. Employment status was recoded as either employed or unemployed, regardless of the reason for unemployment. Housing status was categorized based on home ownership (own flat or house) versus renting. Educational attainment was grouped into three levels: basic education, secondary education, and upper secondary education.

# Supplementary Figures

Supplementary Figure 1: Forest plot of taxa-host associations of core genera as estimated by multivariable linear regression models on CLR transformed relative abundances. Points and confidence intervals are highlighted in orange when the CI does not include zero

# Supplementary Tables

Supplementary Table 2: PERMANOVA R² values (%) for different distance/dissimilarity metric by variable obtained by multivariable PERMANOVA models estimating marginal effects

|  | Distance/Dissimilarity Metrics | | | |
| --- | --- | --- | --- | --- |
| Variable | Bray-Curtis | Unweighted  UniFrac | Weighted  UniFrac | Robust Aitchison |
| Education level | 0.44% | 0.56% | 0.4% | 0.47% |
| Employment status | 0.19% | 0.22% | 0.55% | 0.18% |
| Sex | 0.26% | 0.2% | 0.5% | 0.16% |
| Age (years) | 0.51% | 0.13% | 0.24% | 0.21% |
| Number of children | 0.33% | 0.23% | 0.17% | 0.32% |
| Body fat (%) | 0.19% | 0.15% | 0.56% | 0.08% |
| Any antibiotic use | 0.15% | 0.1% | 0.44% | 0.12% |
| Any diagnosed allergy | 0.24% | 0.07% | 0.27% | 0.11% |
| Lifetime cigarette consumption per day | 0.31% | 0.07% | 0.05% | 0.22% |
| Susceptibility to infections | 0.09% | 0.15% | 0.06% | 0.11% |
| Depression | 0.09% | 0.08% | 0.11% | 0.07% |
| BMI (kg/m²) | 0.05% | 0.11% | 0.01% | 0.13% |
| FEV1 (Forced Expiratory Volume) | 0.08% | 0.05% | 0.01% | 0.09% |
| Household size | 0.07% | 0.05% | 0.02% | 0.06% |

# References

1. Fischer B, Sedlmeier AM, Hartwig S, Schlett CL, Ahrens W, Bamberg F, et al. Anthropometric measures in the German National Cohort—more than weight and height. Bundesgesundheitsbl. 2020;63:290–300. https://doi.org/10.1007/s00103-020-03096-w.

2. Dragano N, Reuter M, Greiser KH, Becher H, Zeeb H, Mikolajczyk R, et al. Socio-demographic and employment-related factors in the German National Cohort. Bundesgesundheitsbl. 2020;63:267–78. https://doi.org/10.1007/s00103-020-03098-8.

3. Karrasch S, Peters A, Meisinger C, Ferland M, Jaeschke L, Pischon T, et al. Lung function in the German National Cohort: methods and initial results. Bundesgesundheitsbl. 2020;63:322–31. https://doi.org/10.1007/s00103-020-03102-1.

4. Völker MP, Callies CM, Frank J, Foo JC, Reinhard I, Zillich L, et al. From cigarettes to symptoms: the association between smoking and depression in the German National Cohort (NAKO). BMC Public Health. 2026;26 ✓:301. https://doi.org/10.1186/s12889-025-25959-0.

5. Saunders JB, Aasland OG, Babor TF, De La Fuente JR, Grant M. Development of the Alcohol Use Disorders Identification Test (AUDIT): WHO Collaborative Project on Early Detection of Persons with Harmful Alcohol Consumption‐II. Addiction. 1993;88:791–804. https://doi.org/10.1111/j.1360-0443.1993.tb02093.x.

6. Castell S, Akmatov MK, Obi N, Flesh-Janys D, Nieters A, Kemmling Y, et al. Test–retest reliability of an infectious disease questionnaire and evaluation of self-assessed vulnerability to infections: Findings of Pretest 2 of the German National Cohort. Bundesgesundheitsbl. 2014;57:1300–7. https://doi.org/10.1007/s00103-014-2045-x.

7. Langer S, Horn J, Kluttig A, Mikolajczyk R, Karrasch S, Schulz H, et al. Occurrence of bronchial asthma and age at initial asthma diagnosis—first results of the German National Cohort. Bundesgesundheitsbl. 2020;63:397–403. https://doi.org/10.1007/s00103-020-03105-y.

8. Hassenstein MJ, Aarabi G, Ahnert P, Becher H, Franzke C-W, Fricke J, et al. Self-reported infections in the German National Cohort (GNC) in the context of the current research landscape. Bundesgesundheitsbl. 2020;63:404–14. https://doi.org/10.1007/s00103-020-03114-x.
